# Supplementary material
Source: publisher site journal article supplement (https://www.dovepress.com/article/369625)
Supplement: Supplementary file 1 [file get_supplementary_file.php]

**Appendix 1** Original questions of the patients´ questionnaire and the GP´s questionnaire

| **Corresponding questions** |  |
| --- | --- |
| **Patient** | **GP** |
| **Preconditions** |  |
| *“Do you own a smartphone?” (yes/no)* | *“In which situations does it make sense in your opinion to ask patients about ADRs?”*  *(multiple selection possible)*  The following situations were requested:  *“If it is difficult for the patient to reach the medical practice.”*  *“Concerning patients living in nursing homes.”*  *“Initiation of pharmacotherapy.”*  *“Change of pharmacotherapy.”*  *“Enduring pharmacotherapy.”*  *“If particular drugs are prescribed.”*  *“Others.”*  *“I don´t think such an app makes sense in any situation.”* |
| *“Do you carry your smartphone with you?” (yes/no)* |
| *“Have you ever experienced any uncertainty with newly prescribed medication?” (no/rather no/rather yes/yes)*  *“Will your GP be easy to contact, if you do not tolerate a newly prescribed medication?” (no/rather no/rather yes/yes)* |
|  |
|  |
|  |
| *“Would you use an app as described to report ADRs to your GP?” (no/rather no/rather yes/yes)* | *“Would you use a software as described?” (no/rather no/rather yes/yes)* |
| **Requirements concerning app content** |  |
| *“Can you imagine anything under the term “app”?*  *(filter question)*  *“In what case would you rate an app as described as useful?” (no/rather no/rather yes/yes)*  The following functionalities were requested:  Indication of the burden on the patient due to ADR;  Indication of the urgency of a GP consultation from the patient's perspective;  Indication of difficulties in medication administration | *“How useful is it from your point of view to be supported by a software in managing your patients´ ADRs, if…”*  *(Not at all useful/not useful/rather not useful/rather useful/useful/very useful)*  The following functionalities were requested:  Indication of the burden on the patient due to ADR;  Indication of the urgency of a GP consultation from the patient's perspective;  Indication of difficulties in medication administration;  Indication of the duration of ADR;  Indication of the time of day at which the ADR occurred;  Indication of self-treatment for alleviating ADR;  Indication of patient´s deviation from GP´s advice;  Indication of parameters measured by patients themselves (eg blood pressure) |
| *“Would you be willing to use the app to…” (no/rather no/rather yes/yes)*  The following functionalities were requested:  Indication of the duration of ADR;  Indication of the time of day at which the ADR occurred;  Indication of self-treatment for alleviating ADR;  Indication of patient´s deviation from GP´s advice;  Indication of parameters measured by patients themselves (eg blood pressure) |
| **Requirements concerning app process**  **(a) Answering query on ADRs in app**  **(b) Assessing information** |  |
| *“Can you imagine anything under the term “app”?*  *(filter question)*  *“In what case would you rate an app as described as useful?” (no/rather no/rather yes/yes)*  The following functionalities were requested:  Report of ADRs to GP by patient at any time**(a)**; | *“How useful is it from your point of view to be supported by a software managing your patients´ ADRs, if…”*  *(Not at all useful/not useful/rather not useful/rather useful/useful/very useful)*  The following functionalities were requested:  Report of ADRs to GP by patient at any time**(a)**; |
| IT-supported query for specific ADR at specific time by app**(a)** | IT-supported query for specific ADR at specific time by app**(a)**;  Query for ADR with standardized questions on the respective medication**(a)**;  Additionally, adapting of the questions to the individual patient**(a)** |
| *“Would you like to select an ADR from a prepared list or describe it in your own words when reporting an ADR via app to the GP?”***(a)**  *(rather select from a list/both/rather describe in own words)* | *“Should the patient select an ADR from a prepared drug-specific list or describe it in his own words when reporting an ADR via app?”***(a)**  *(rather select from a list/both/rather describe in own words)* |
| *“Reporting ADR via app weekly is…”***(a)**  *(too rare/just right/too frequent)* | *“How much would it discourage you from using such a software, if the report of ADRs has to be opened via a link in the email inbox?***(b)***”*  *(not at all/little/rather little/rather strong/strong/very strong)* |
|  | *“How much would it discourage you from using such a software, if the report of ADRs has to be opened via an additional password entry?”***(b)**  *(not at all/little/rather little/rather strong/strong/very strong)* |
|  | *“How should reports of ADRs be transferred from patient to GP?***(b)**  *Individually, after entering by the patient;*  *Bundled once a day at a freely selectable time;*  *Bundled when a certain number of ADR reports is reached;*  *Prioritized by urgency”*  *(multiple selection possible)* |
| *“In what case would you rate an app as described as useful?” (no/rather no/rather yes/yes)*  The following functionalities were requested:  Rapid feedback on whether personal consultation is necessary because of ADR**(b)** | *“How useful is it from your point of view to be supported by a software in managing your patients´ ADRs, if a visualization of urgency (eg traffic light scheme) with which to deal with the report, is realized?***(b)**  *(Not at all useful/not useful/rather not useful/rather useful/useful/very useful)* |
| **Further barriers** |  |
| Following the question if patient would use such an app:  *“If no, what are reasons against it?” (free text)*  *“What else would be important to you with such an app?” (free text)* | *“What further requirements would you place on such a software in order that it can be integrated into your everyday practice and supports you in the therapy of your patients? (free text)* |
